# Supplementary material for: Circadian Clock Genes Are Correlated with Prognosis and Immune Cell Infiltration in Colon Adenocarcinoma
Source: Hindawi journal article supplement (doi:10.1155/2022/1709918), 2022-01-25
Supplement: f1 [file 1709918.f1.pdf]

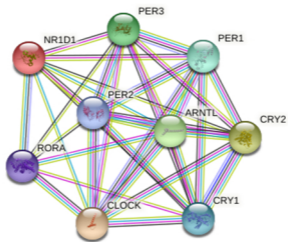

(a)

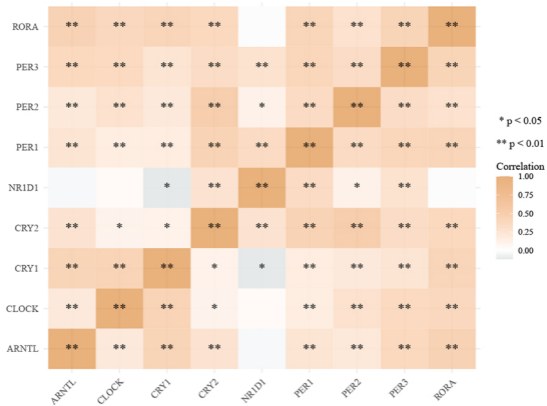

(b)
